# Supplementary material
Source: publisher site journal article supplement (https://www.dovepress.com/article/490717)
Supplement: Supplementary file 1 [file get_supplementary_file.php]

**1 Material and method**

1.1CUMS animal model

To ensure the random unpredictability of stimuli, we administered 1-2 types of stimuli daily, totaling 12 types over the 28-day period: 24-hour water fasting, 24-hour food fasting, 1-hour empty bottle stimulation, 24-hour damp bedding, 24-hour tilting of rat cages at 45°, 24-hour combination of rat cages, 3-minute tail pinching, 3-hour whole-body restraint, 24-hour placement of foreign objects in cages, 10 instances of plantar electrostimulation at 1mA for 10 seconds each, 85dB noise stimulation for 3 hours with intermittent intervals, and 5-hour strobe light stimulation at 120 times per minute. Each stimulus occurred non-consecutively, limited to a maximum of 3 occurrences. Throughout this period, normal control rats remained in their usual environment.

1.2Primer sequence

| Gene target | Forward sequence(5’ to 3’) | Reverse sequence(5’ to 3’) |
| --- | --- | --- |
| *APLN* | AGAAGAAGGCAACATGCGCT | GGAGAGCCCTTCAATCCTGCT |
| *LEP* | TTTCACACACGCAGTCGGT | CTGCAGCACGTTTTGGGAAG |
| *MHC Ⅱ* | TGTGAGATACCAGGAGGTGATG | TCTCTGCTGAGGTGAAGAGC |
| *TLR2* | TGGAGGTCTCCAGGTCAAATC | ACAGAGATGCCTGGGCAGAAT |
| *TLR4* | CTGAGCTTCAACCCCCTGAA | TGTCTCAATTTCACACCTGGAT |

**2 Result**

2.1Immune cell correlation analysis

We analyzed correlations between 24 immune cells. Strong positive correlations were found between Tr1 and CD4_T (r=0.95, p<0.001), nTreg and Tr1 (r=0.80, p<0.001), and Gamma_delta and CD8_T (r=0.66, p=0.001). Conversely, strong negative correlations were observed between Neutrophil and Gamma_delta (r=-0.65, p=0.001), Monocyte and DC (r=-0.67, p<0.001), and CD4_T and NK (r=-0.61, p=0.003) (Figure 4F).

2.2 CIBERSORT analysis


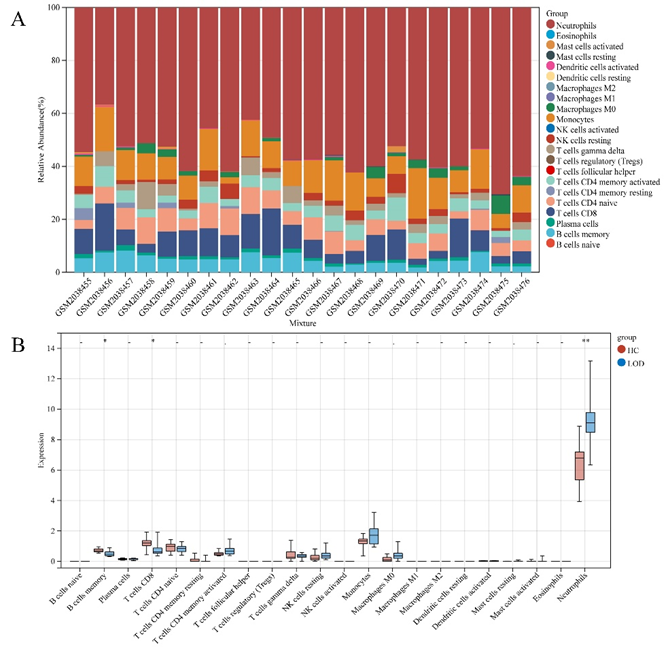


Figure S1 Immune infiltration analysis by CIBERSORT. (A) Stacked bar plots showing the proportion of each 22 subtypes of immune cells. (E) Violin plots of the abundance of 22 immune-cell subtypes between HC and LOD.

Table S1 Details of the RNA expression profile datasets

| Dataset | Platform | PMID | LOD/HC | Sample  type | Gender  (female/male) | Age  (mean ± SD) |
| --- | --- | --- | --- | --- | --- | --- |
| GSE76826 | GPL17077  Agilent-039494 SurePrint G3 Human GE v2 8x60K Microarray 039381 (Probe Name version) | 26926397 | 10/12 | blood | 13/9 | 65.6±11.02 |

Table S2 GSEA analysis

| Term | NES | pvalue | FDR |
| --- | --- | --- | --- |
| EPITHELIAL_CELL_SIGNALING_IN_HELICOBACTER_PYLORI_INFECTION | -1.6913 | 0 | 0.1234 |
| FC_GAMMA_R_MEDIATED_PHAGOCYTOSIS | -1.7418 | 0.002 | 0.0828 |
| LEISHMANIA_INFECTION | -1.8449 | 0.002 | 0.1244 |
| MAPK_SIGNALING_PATHWAY | -1.5686 | 0.002 | 0.1536 |
| TYPE_II_DIABETES_MELLITUS | -1.6547 | 0.0039 | 0.1177 |
| O_GLYCAN_BIOSYNTHESIS | -1.7633 | 0.004 | 0.1097 |
| NOD_LIKE_RECEPTOR_SIGNALING_PATHWAY | -1.6139 | 0.0063 | 0.1149 |
| FRUCTOSE_AND_MANNOSE_METABOLISM | -1.665 | 0.0078 | 0.1361 |
| TOLL_LIKE_RECEPTOR_SIGNALING_PATHWAY | -1.7554 | 0.0081 | 0.0881 |
| JAK_STAT_SIGNALING_PATHWAY | -1.4462 | 0.0081 | 0.1651 |
| RIG_I_LIKE_RECEPTOR_SIGNALING_PATHWAY | -1.6282 | 0.012 | 0.117 |
| REGULATION_OF_ACTIN_CYTOSKELETON | -1.4558 | 0.0122 | 0.1577 |
| INOSITOL_PHOSPHATE_METABOLISM | -1.6156 | 0.0146 | 0.1221 |
| ERBB_SIGNALING_PATHWAY | -1.5082 | 0.0157 | 0.1601 |
| PHOSPHATIDYLINOSITOL_SIGNALING_SYSTEM | -1.4594 | 0.0182 | 0.1666 |
| ADIPOCYTOKINE_SIGNALING_PATHWAY | -1.5215 | 0.0186 | 0.1635 |
| GLYCOSAMINOGLYCAN_DEGRADATION | -1.5436 | 0.0202 | 0.1662 |
| ENDOCYTOSIS | -1.5068 | 0.0204 | 0.1557 |
| REGULATION_OF_AUTOPHAGY | -1.4828 | 0.0207 | 0.1575 |
| GNRH_SIGNALING_PATHWAY | -1.486 | 0.0231 | 0.1644 |
| ALZHEIMERS_DISEASE | -1.5798 | 0.0248 | 0.1493 |
| GLYCOSAMINOGLYCAN_BIOSYNTHESIS_CHONDROITIN_SULFATE | -1.4967 | 0.0264 | 0.1567 |
| GLYCEROPHOSPHOLIPID_METABOLISM | -1.403 | 0.0267 | 0.1804 |
| RIBOFLAVIN_METABOLISM | -1.5227 | 0.0323 | 0.1697 |
| CHEMOKINE_SIGNALING_PATHWAY | -1.4852 | 0.0329 | 0.1598 |
| PARKINSONS_DISEASE | -1.7736 | 0.0331 | 0.146 |
| STARCH_AND_SUCROSE_METABOLISM | -1.4741 | 0.0348 | 0.1585 |
| GLYCOSAMINOGLYCAN_BIOSYNTHESIS_HEPARAN_SULFATE | -1.4334 | 0.0353 | 0.1716 |
| INSULIN_SIGNALING_PATHWAY | -1.5142 | 0.0363 | 0.1589 |
| ETHER_LIPID_METABOLISM | -1.3742 | 0.0376 | 0.183 |
| NEUROTROPHIN_SIGNALING_PATHWAY | -1.5495 | 0.0409 | 0.1688 |
| NICOTINATE_AND_NICOTINAMIDE_METABOLISM | -1.4573 | 0.0425 | 0.1601 |
| ALDOSTERONE_REGULATED_SODIUM_REABSORPTION | -1.3815 | 0.043 | 0.1845 |
| PANCREATIC_CANCER | -1.5038 | 0.0439 | 0.1535 |
| ENDOMETRIAL_CANCER | -1.5434 | 0.0439 | 0.1578 |
| HUNTINGTONS_DISEASE | -1.6511 | 0.0461 | 0.1091 |
| PROSTATE_CANCER | -1.4209 | 0.0466 | 0.1745 |
| CHRONIC_MYELOID_LEUKEMIA | -1.5157 | 0.0468 | 0.1645 |
| RENAL_CELL_CARCINOMA | -1.5296 | 0.0499 | 0.1686 |

Table S3 The interacting genes for APLN and LEP

| Genes |
| --- |
| NMU |
| APLN |
| NUCB2 |
| NPY5R |
| PYY |
| PMCH |
| HCRT |
| LEP |
| GHRL |
| AGRP |
| RETNLB |
| ITLN1 |
| NPB |
| SERPINA12 |
| RBP4 |
| FNDC5 |
| NPY4R |
| NMS |
| NPW |
| RARRES2 |
| APELA |
| CCL24 |
| CCL23 |

Table S4 Top five compounds

| Score | ID | Name | Description |
| --- | --- | --- | --- |
| 99.86 | BRD-K48735772 | PD-158780 | EGFR inhibitor |
| 99.82 | BRD-K97399794 | quercetin | Polar auxin transport inhibitor |
| 99.72 | BRD-A76093993 | cromakalim | Potassium channel activator |
| 99.65 | BRD-A36066264 | estradiol-benzoate | Estrogen receptor agonist |
| 99.65 | BRD-K43405658 | tyrphostin-AG-527 | Protein tyrosine kinase inhibitor |
